# Supplementary material
Source: PubMed Central journal article supplement (PMC4548335)
Supplement: ajcr0005-2241-f3.pdf [file ajcr0005-2241-f3.pdf]

## ITF-2B-a prognostic biomarker

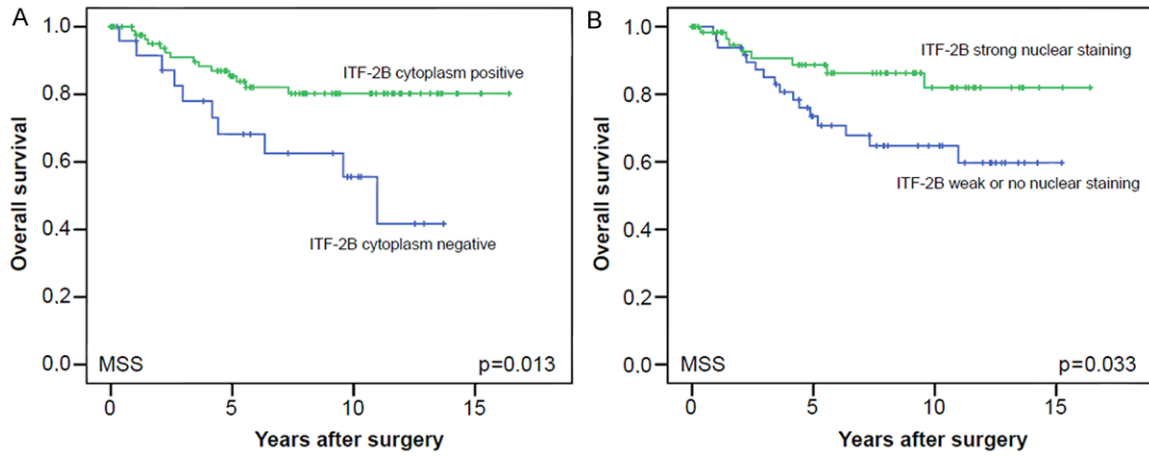

**Supplementary Figure 1.** Correlation of ITF-2B staining with overall survival in MSS cases. A. Kaplan-Meier plot of colorectal cancer specimens (n=213) demonstrated significant (log-rank test) better overall survival in patients with detectable cytoplasmic ITF-2B levels (p=0.013). B. Kaplan-Meier plot demonstrated significant better overall survival in patients with detectable intensity of nuclear ITF-2B staining (p=0.033).
